# Supplementary material for: Selective and sensitive toxic gas-sensing mechanism in a 2D Janus MoSSe monolayer
Source: Royal Society of Chemistry journal article supplement (doi:10.1039/d2cp01648f), 2022-01-01
Supplement: d2cp01648f1.pdf [file d2cp01648f1.pdf]

1

## **SUPPLEMENTARY MATERIAL**

2

### **Selective and sensitive toxic gas sensors mechanism in 2D Janus MoSSe monolayer**

3

Bindiya Babariya<sup>a</sup>, Dhara Raval<sup>a</sup>, Sanjeev K. Gupta<sup>b,\*</sup> and P. N. Gajjar<sup>a,\*</sup>

4

<sup>a</sup>Department of Physics, University School of Sciences, Gujarat University, Ahmedabad  
380009, India.

5

6

<sup>b</sup>Computational Materials and Nanoscience Group, Department of Physics and Electronics,  
St. Xavier's College, Ahmedabad 380009, India.

7

8

9

10

11

12 **Keyword (s):** Janus MoSSe monolayer; Electronic; Sensing; Transport properties; DFT

13 \*Corresponding authors: Prof. (Dr.) P. N. Gajjar (E-mail: [pngajjar@gujaratuniversity.ac.in](mailto:pngajjar@gujaratuniversity.ac.in),

14 [pngajjar@rediffmail.com](mailto:pngajjar@rediffmail.com)) and Dr. Sanjeev K. Gupta (E-mail: [sanjeev.gupta@sxca.edu.in](mailto:sanjeev.gupta@sxca.edu.in))

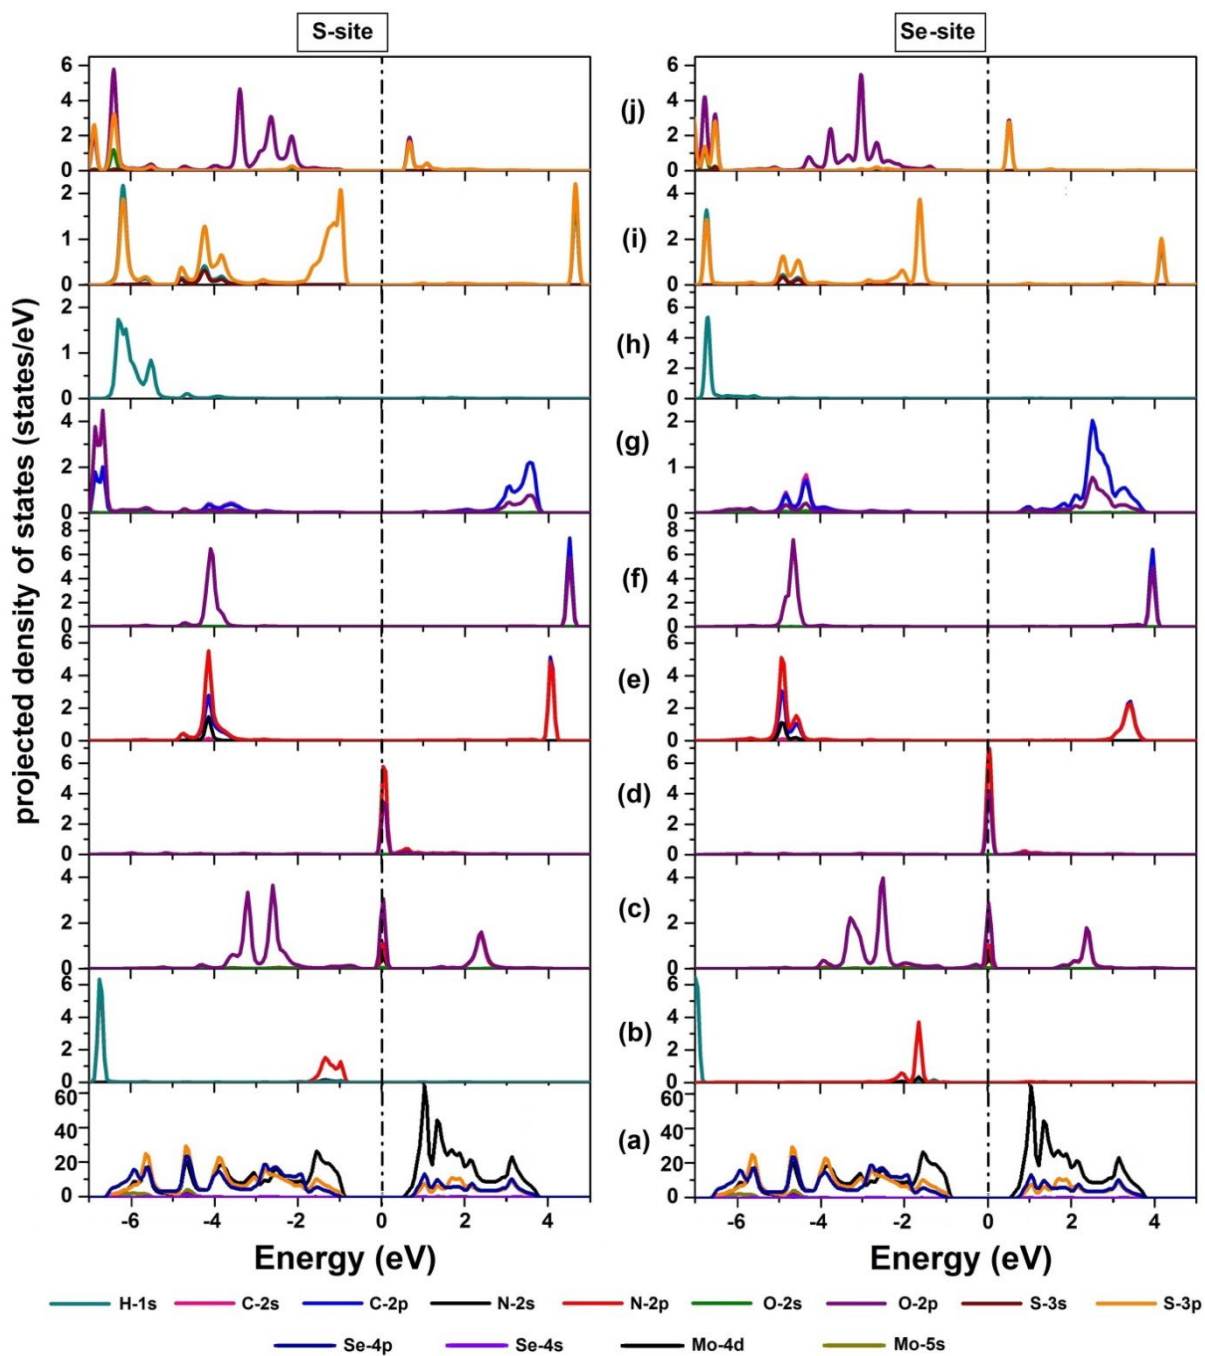

Figure S1. (colour online) PDOS of the adsorbate (a) pristine (b) NH<sub>3</sub> (c) NO<sub>2</sub> (d) NO (e) HCN (f) CO<sub>2</sub> (g) CO (h) H<sub>2</sub> (i) H<sub>2</sub>S and (j) SO<sub>2</sub> on both S and Se site. The dotted line displays the Fermi level set to zero.
